# Supplementary material for: Effects of nonequilibrium fluctuations on ultrafast short-range electron transfer dynamics
Source: PubMed Central journal article supplement (PMC7272615; doi:10.1038/s41467-020-15535-y), 2020-06-04
Supplement: 41467_2020_15535_MOESM1_ESM.pdf [file 41467_2020_15535_MOESM1_ESM.pdf]

**Effects of nonequilibrium fluctuations on ultrafast  
short-range electron transfer dynamics  
Supplementary Information**

Lu et al.

# Supplementary Information for Effects of nonequilibrium fluctuations on ultrafast short-range electron transfer dynamics

Yangyi Lu<sup>1</sup>, Mainak Kundu<sup>1</sup> & Dongping Zhong<sup>1,2</sup>

<sup>1</sup>*Department of Physics, Department of Chemistry and Biochemistry, Programs of Biophysics, Chemical Physics, and Biochemistry, The Ohio State University, Columbus, Ohio 43210, United States.*

<sup>2</sup>*Center for Ultrafast Science and Technology, School of Chemistry and Chemical Engineering, School of Physics and Astronomy, Shanghai Jiao Tong University, Shanghai 200240, China.*

*(email: zhong.28@osu.edu)*

This file of supplementary information contains detailed derivations of key equations used in the main text.

## Supplementary Note 1: The nonergodic reaction free energy

We start with the theoretical framework used by Matyushov<sup>1</sup>. The solvent coordinate,  $x$ , is defined as the polarization energy induced by the difference dipole between the dipoles generated by the reactant (R) and product (P) states of the ET reaction,

$$x = - \int d\vec{r} \vec{P}(\vec{r}) \cdot \Delta \vec{E}_0(\vec{r}), \quad \Delta \vec{E}_0 = \vec{E}_1 - \vec{E}_2, \quad (1)$$

where  $\vec{E}_1$  and  $\vec{E}_2$  are electric fields generated by the R and P states of the donor-acceptor pair. Assume that the polarization field  $\vec{P}(\vec{r})$  is linearly proportional to the electric field,

$$\vec{P}(\vec{r}) = \int d\omega \int d\vec{r}' \chi(\omega, \vec{r}, \vec{r}') \cdot \vec{E}(\vec{r}'), \quad (2)$$

where  $\chi(\omega, \vec{r}, \vec{r}')$  is the dielectric tensor which is dependent on the frequency  $\omega$ . It is assumed that the R state of the system is in equilibrium with the environment. That is, at  $t = 0$ , the system is "frozen" at the polarization<sup>1</sup>,

$$\vec{P}_f(\vec{r}) = \int d\omega \int d\vec{r}' \chi(\omega, \vec{r}, \vec{r}') \cdot \vec{E}_1(\vec{r}'). \quad (3)$$

Hence, we define the origin of the solvent coordinate to be

$$x_0 = - \int d\vec{r} \vec{P}_f(\vec{r}) \cdot \Delta \vec{E}_0(\vec{r}), \quad \Delta \vec{E}_0 = \vec{E}_1 - \vec{E}_2, \quad (4)$$

Equivalently, the solvent coordinate is redefined to be

$$x = - \int d\vec{r} (\vec{P}(\vec{r}) - \vec{P}_f(\vec{r})) \cdot \Delta \vec{E}_0(\vec{r}). \quad (5)$$

Using the method of restricted ensembles<sup>2</sup>, we let the cutoff frequency of the environmental relaxation modes be the average ET rate  $k_{ET}$ . The *nonergodic* solvent coordinate with a given  $k_{ET}$  is written by

$$x = - \int d\omega \theta(|\omega| - k_{ET}) \int d\vec{r}_1 \int d\vec{r}_2 (\vec{E}(\vec{r}_1) - \vec{E}_1(\vec{r}_1)) \cdot \chi(\omega, \vec{r}_1, \vec{r}_2) \cdot \Delta \vec{E}_0(\vec{r}_2). \quad (6)$$

The physical picture behind this method is that only relaxation modes that are faster than the cutoff frequency,  $k_{ET}$ , actively contribute to the polarization of the system, while all the slow modes stay in equilibrium with  $\vec{E}_1$ , the R state of the system. Then, the difference of polarization energies of the R and P states,  $\Delta G_{sol}$ , is given by<sup>1</sup>

$$\Delta G_{sol}(k_{ET}) = \int d\omega \theta(|\omega| - k_{ET}) \int d\vec{r}_1 \int d\vec{r}_2 \left( \frac{1}{2} \vec{E}_1(\vec{r}_1) \cdot \chi(\omega, \vec{r}_1, \vec{r}_2) \cdot \vec{E}_1(\vec{r}_2) - \frac{1}{2} \vec{E}_2(\vec{r}_1) \cdot \chi(\omega, \vec{r}_1, \vec{r}_2) \cdot \vec{E}_2(\vec{r}_2) \right), \quad (7)$$

and the outer reorganization energy  $\lambda_o$ , including contributions of the environmental relaxation modes, reads

$$\lambda_o(k_{ET}) = \int d\omega \theta(|\omega| - k_{ET}) \int d\vec{r}_1 \int d\vec{r}_2 \frac{1}{2} \Delta \vec{E}_0(\vec{r}_1) \cdot \chi(\omega, \vec{r}_1, \vec{r}_2) \cdot \Delta \vec{E}_0(\vec{r}_2). \quad (8)$$

Both are dependent on the reaction rate  $k_{ET}$ . It is easily seen that

$$\begin{aligned} \Delta G_{sol}(k_{ET}) + \lambda_o(k_{ET}) &= \int d\omega \theta(|\omega| - k_{ET}) \int d\vec{r}_1 \int d\vec{r}_2 \vec{E}_1(\vec{r}_1) \cdot \chi(\omega, \vec{r}_1, \vec{r}_2) \cdot \Delta \vec{E}_0(\vec{r}_2) \\ &= \int d\omega \int d\vec{r}_1 \int d\vec{r}_2 \vec{E}_1(\vec{r}_1) \cdot \chi(\omega, \vec{r}_1, \vec{r}_2) \cdot \Delta \vec{E}_0(\vec{r}_2), \end{aligned} \quad (9)$$

which is a constant. That means, regardless of the value of  $k_{ET}$ , the following identity always holds

$$\Delta G_{sol}(k_{ET}) + \lambda_o(k_{ET}) = \Delta G_{sol}^{eq} + \lambda_o^{eq}, \quad (10)$$

where  $\Delta G_{sol}^{eq} = \lim_{k_{ET} \rightarrow 0} \Delta G_{sol}(k_{ET})$  and  $\lambda_o^{eq} = \lim_{k_{ET} \rightarrow 0} \lambda_o(k_{ET})$ . This proves Equation 18 in the main text.

## Supplementary Note 2: The generalized Fokker-Planck equation

In the literature, the solvent coordinate  $x$ , being the polarization energy, was often modeled as a random process, which followed the Brownian motion<sup>3,4</sup>. In the



work of Sumi and Marcus<sup>5</sup>, the environmental motion, assumed to follow the Debye relaxation, was governed by the Fokker-Planck equation. However, for a general form of relaxations  $S(t)$ , a generalized approach needs to be taken.

We start with an overdamped generalized Langevin equation with a memory kernel  $K(t)$ <sup>6</sup>,

$$\frac{dx}{dt} = - \int_0^t K(t-\tau)x(\tau)d\tau + \xi(t), \quad (11)$$

where  $\xi(t)$  is a colored noise with mean 0,  $\langle \xi(t) \rangle = 0$ . According to the fluctuation-dissipation theorem<sup>7</sup>, the memory kernel  $K(t)$  satisfies a relation with the noise  $\xi(t)$ ,

$$K(\tau) = C \langle \xi(t+\tau)\xi(t) \rangle, \quad (12)$$

where the condition of stationarity is assumed. By Laplace transforming the Langevin equation of  $x(t)$ , we get

$$\hat{x}(z) = \frac{x(0)}{z + \hat{K}(z)} + \frac{\hat{\xi}(z)}{z + \hat{K}(z)}, \quad (13)$$

where  $x(0)$  is the value of  $x(t)$  at  $t = 0$ , and

$$\hat{f}(z) = \int_0^\infty dt f(t)e^{-zt}, \quad (14)$$

for a general function  $f(t)$ . By the inverse Laplace transform of Equation 13, we get

$$x(t) = x(0)S(t) + \int_0^t d\tau S(t-\tau)\xi(\tau), \quad (15)$$

where  $S(t)$  is the normalized auto-correlation function (TCF) of  $x(t)$  (defined in Equation 14 in the main text), whose Laplace transform satisfies

$$\hat{S}(z) = \frac{1}{z + \hat{K}(z)}. \quad (16)$$

If  $\xi(t)$  is a Gaussian process,  $x(t)$  is also a Gaussian process with its mean  $\bar{x}(t)$  and variance  $A(t)$  given by

$$\begin{aligned}\bar{x}(t) &= x(0)S(t), \\ A(t) &= \langle (x(t) - x(0)S(t))^2 \rangle = C^{-1} \int_0^t \int_0^t dt_1 dt_2 S(t-t_1)S(t-t_2)K(t_1-t_2).\end{aligned}\quad (17)$$

The probability distribution function (pdf)  $P(x, t|x(0), t=0)$  is given by

$$P(x, t|x(0), t=0) = \left(\frac{1}{2\pi A(t)}\right)^{1/2} \exp\left(-\frac{(x - \bar{x}(t))^2}{2A(t)}\right).\quad (18)$$

It is straightforward to show that  $P(x, t|x(0), t=0)$  satisfies the differential equation<sup>8</sup>,

$$\frac{\partial P}{\partial t} = \left(\frac{\dot{A}(t)}{2} - \frac{\dot{S}(t)}{S(t)}A(t)\right) \frac{\partial^2 P}{\partial x^2} - \frac{\dot{S}(t)}{S(t)} \frac{\partial}{\partial x}(xP),\quad (19)$$

In this expression,  $\dot{A}(t)$  can be computed by

$$\begin{aligned}\dot{A}(t) &\equiv \frac{dA}{dt} = \frac{2}{C}S(t)\mathcal{L}^{-1}\{\hat{S}(z)\hat{K}(z)\} \\ &= \frac{2}{C}S(t)\mathcal{L}^{-1}\{\hat{S}(z)\left(\frac{1}{\hat{S}(z)} - z\right)\} \\ &= -\frac{2}{C}S(t)\dot{S}(t), \quad S(0) = 1,\end{aligned}\quad (20)$$

where  $\mathcal{L}^{-1}\{\hat{f}(z)\}$  means the inverse Laplace transform of the function  $\hat{f}(z)$ . As a result,

$$A(t) = \frac{1}{C}(1 - S^2(t)),\quad (21)$$

where the constant  $C$  is given by

$$C = \lim_{t \rightarrow \infty} \frac{1}{A(t)} = \lim_{t \rightarrow \infty} \langle x^2(t) \rangle^{-1}.\quad (22)$$

Hence, the pdf of  $x(t)$  follows the generalized Fokker-Planck equation,

$$\frac{\partial P}{\partial t} = D(t) \left( C^{-1} \frac{\partial^2 P}{\partial x^2} + \frac{\partial}{\partial x}(xP) \right),\quad (23)$$

where  $D(t)$  is the time-dependent diffusion coefficient<sup>9</sup>,

$$D(t) = -\frac{1}{S(t)} \frac{dS(t)}{dt}. \quad (24)$$

In the limit of  $t \rightarrow \infty$ ,  $A(t) \rightarrow C^{-1}$ , the pdf of  $x(t)$  becomes

$$P(x, t|x(0), t=0) \rightarrow P_{eq}(x) = \left(\frac{C}{2\pi}\right)^{1/2} \exp\left(-\frac{C}{2}x^2\right). \quad (25)$$

Therefore, a statistical free energy function  $F(x)$  can be defined through  $P_{eq}(x)$  as follows,

$$P_{eq}(x) \propto \exp\left(-\frac{F(x)}{k_B T}\right), \quad (26)$$

which gives the form of  $F(x)$  as

$$F(x) = \frac{k_B T C}{2} x^2. \quad (27)$$

Comparing this form with the free energy function defined in Equation 10a in the main text, we get

$$C^{-1} = 2k_B T \lambda_o(k_{ET}). \quad (28)$$

Finally, the generalized Fokker-Planck equation, which governs the local motions around the donor and acceptor, is given by

$$\frac{\partial P}{\partial t} = D(t) \left( 2\lambda_o^\gamma k_B T \frac{\partial^2 P}{\partial x^2} + \frac{\partial}{\partial x}(xP) \right), \quad (29)$$

where  $\lambda_o^\gamma \equiv \lambda_o(k_{ET})$ . This proves Equation 24 in the main text.

### Supplementary Note 3: Photo-excited ET reactions

In a photo-excited ET reaction, at  $t = 0$ , the local environment is in equilibrium with the ground state of the donor-acceptor pair with the electric field,  $\vec{E}_0$ . Hence we define the "frozen" polarization vector to be

$$\vec{P}_f(\vec{r}) = \int d\omega \int d\vec{r}' \chi(\omega, \vec{r}, \vec{r}') \cdot \vec{E}_0(\vec{r}'), \quad (30)$$

and the origin of the solvent coordinate  $x_0$  is shifted accordingly,

$$x_0 = - \int d\vec{r} \vec{P}_f(\vec{r}) \cdot \Delta \vec{E}_0(\vec{r}), \quad \Delta \vec{E}_0 = \vec{E}_1 - \vec{E}_2, \quad (31)$$

Then the solvent coordinate is shifted according to Equation 5.  $\vec{E}_0$  differs slightly from the electric field of the excited state,  $\vec{E}_1$ . The difference can be approximately measured through the solvation experiment <sup>10</sup>, which gives the stabilization energy,  $\Delta E_{sol}$  (see Equation 15 in the main text). It is easy to see that the difference of the minima of the excited state and the ground state of the donor-acceptor pair,  $\Delta x(k_{ET})$ , has an approximate relation with  $\Delta E_{sol}$  <sup>11</sup>,

$$\begin{aligned} \Delta x(k_{ET}) &= \int d\omega \theta(|\omega| - k_{ET}) \int d\vec{r}_1 \int d\vec{r}_2 (\vec{E}_1(\vec{r}_1) - \vec{E}_0(\vec{r}_1)) \cdot \chi(\omega, \vec{r}_1, \vec{r}_2) \cdot \Delta \vec{E}_0(\vec{r}_2) \\ &= \gamma \lim_{k_{ET} \rightarrow 0} \Delta x(k_{ET}) \approx \gamma \Delta E_{sol}, \end{aligned} \quad (32)$$

where  $\gamma$  is given by (see Equation 16 in the main text)

$$\gamma = \int_{-\infty}^{+\infty} d\omega S(\omega) \theta(|\omega| - k_{ET}), \quad (33)$$

and  $S(\omega)$  is the Fourier transform of  $S(t)$ . Similarly, the identity between  $\Delta G_{sol}(k_{ET})$  and  $\lambda_o(k_{ET})$  (see Equation 9) is modified because of the shift of  $\vec{P}_f$ ,

$$\Delta G_{sol}(k_{ET}) + \lambda_o(k_{ET}) + \Delta x(k_{ET}) = \Delta G_{sol}^{eq} + \lambda_o^{eq} + \Delta E_{sol}. \quad (34)$$

This is Equation 28 in the main text.

The initial distribution of the local environment is in equilibrium with the electric field,  $\vec{E}_0$ . Equivalently,  $P(x, t = 0)$  is centered at  $x = 0$ , by definition. According to the concept of restricted ensembles, the variance of  $P(x, t = 0)$  is given by  $2\lambda_o^\gamma k_B T$  because relaxation modes of the local environment, which are slower than the ET reaction, are inactive during the reaction time. Hence, the initial distribution  $P(x, t = 0)$  is given by

$$P(x, t = 0) = \sqrt{\frac{1}{4\pi\lambda_o^\gamma k_B T}} \exp\left(-\frac{x^2}{4\lambda_o^\gamma k_B T}\right), \quad (35)$$

which is Equation 30 in the main text.

#### Supplementary Note 4: The correlation function with multiple exponential components

If the solvation correlation function  $S(t)$  can be written as a sum of multiple exponential functions,

$$S(t) = \sum_{i=1}^N c_i e^{-t/\tau_i}, \quad (36)$$

where  $N$  is the number of components, the Laplace transform of  $S(t)$ ,  $S(\omega)$ , reads (see Equation 13 in the main text),

$$S(\omega) = \frac{1}{\pi} \int_0^{+\infty} dt S(t) \cos \omega t = \frac{1}{\pi} \sum_{i=1}^N c_i \frac{\tau_i}{1 + (\omega\tau_i)^2}. \quad (37)$$

With a given value of  $k_{ET}$ , the dynamic factor  $\gamma$  can be computed using Equation 33,

$$\gamma = \int_{-\infty}^{+\infty} d\omega S(\omega) \theta(|\omega| - k_{ET}) = 1 - \frac{2}{\pi} \sum_i^N c_i \arctan(k_{ET}\tau_i), \quad (38)$$

which is the same as Equation 31 in the main text.

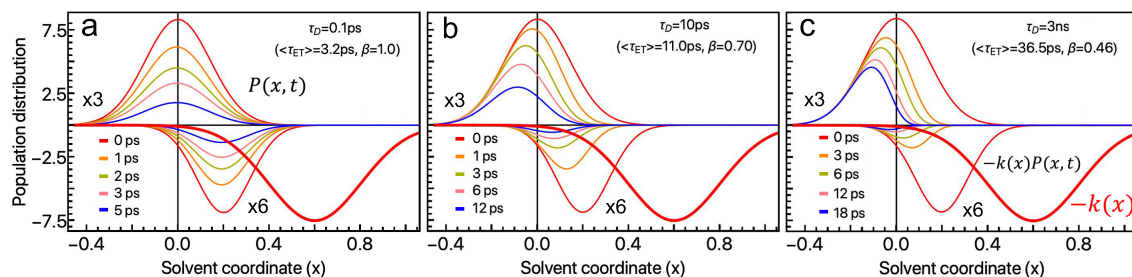

**Supplementary Figure 1:** The time evolution of reactants' distribution,  $P(x, t)$ , with different solvation timescales  $\tau_D$  using the Sumi-Marcus model. Other values of parameters used are,  $J = 0.020\text{eV}$ ,  $\Delta G^o = -0.60\text{eV}$ ,  $\lambda_i = 0.80\text{eV}$ , and  $\lambda_o = 0.40\text{eV}$ , which are the same as Figure 2. The bolded red line represents the curve of  $-k(x)$  without scaling. Within each graph, the upper panel displays the time evolution of  $P(x, t)$ , while the lower panel displays the evolution of the reaction rate's distribution,  $-k(x)P(x, t)$ . (a)  $\tau_D = 0.1\text{ps}$ . (b)  $\tau_D = 10\text{ps}$ . (c)  $\tau_D = 3\text{ns}$ .

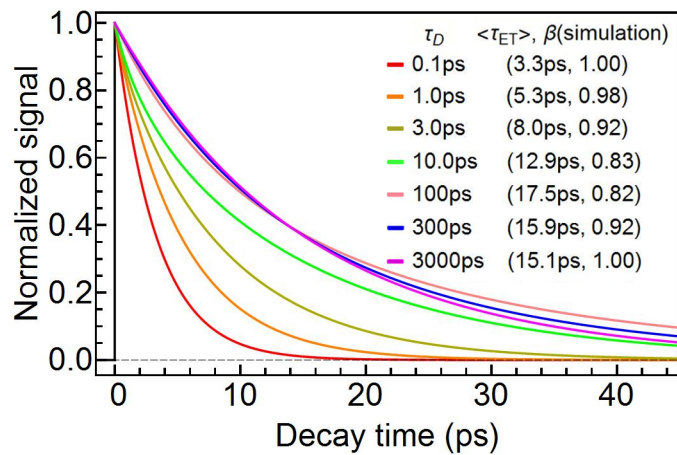

**Supplementary Figure 2:** Simulations of photo-excited ET dynamics with different solvation timescales,  $\tau_D$  using the nonergodic model with the stabilization energy,  $\Delta E_{sol} = 0.025\text{eV}$ . Other values used are the same as those in Supplementary Figure 1.

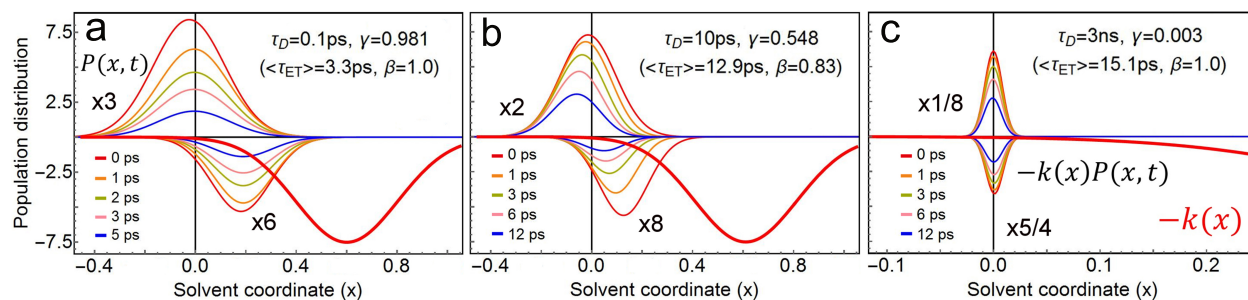

**Supplementary Figure 3:** The time evolution of reactants' distribution,  $P(x, t)$ , with different solvation timescales  $\tau_D$  using the nonergodic model with the stabilization energy,  $\Delta E_{sol} = 0.025 \text{ eV}$ . Values of parameters used are the same as those in Supplementary Figure 1. The bolded red line represents the curve of  $-k(x)$  without scaling. Within each graph, the upper panel displays the time evolution of  $P(x, t)$ , while the lower panel displays the evolution of the reaction rate's distribution,  $-k(x)P(x, t)$ . (a)  $\tau_D = 0.1 \text{ ps}$ . (b)  $\tau_D = 10 \text{ ps}$ . (c)  $\tau_D = 3 \text{ ns}$ .



## Supplementary References

1. Matyushov, D. V. Nonergodic activated kinetics in polar media. *J. Chem. Phys.* **130** (2009).
2. Palmer, R. G. Broken ergodicity. *Adv. Phys.* **31**, 669–735 (1982).
3. Kramers, H. A. Brownian motion in a field of force and the diffusion model of chemical reactions. *Physica* **7** (1940).
4. Calef, D. F. & Wolynes, P. G. Classical solvent dynamics and electron transfer. II. Molecular aspects. *J. Chem. Phys.* **78**, 470–482 (1983).
5. Sumi, H. & Marcus, R. A. Dynamical effects in electron transfer reactions. *J. Chem. Phys.* **84**, 4894–4914 (1986).
6. Risken, H. *The Fokker-Planck Equation* (Springer-Verlag Berlin Heidelberg, 1989).
7. Kubo, R. The fluctuation-dissipation theorem. *Rep. Prog. Phys.* **29** (1966).
8. Adelman, S. A. Fokker-Planck equations for simple non-Markovian systems. *J. Chem. Phys.* **64**, 124–130 (1976).
9. Hynes, J. T. Outer-Sphere Electron-Transfer Reactions and Frequency-Dependent Friction. *J. Phys. Chem.* **90**, 3701–3706 (1986).
10. Chang, C.-W. *et al.* Ultrafast solvation dynamics at binding and active sites of photolyases. *Proc. Natl. Acad. Sci. USA* **107**, 2914–2919 (2010).
11. Maroncelli, M. & Fleming, G. R. Computer simulation of the dynamics of aqueous solvation. *J. Chem. Phys.* **89**, 1988 (1988).
